# Supplementary material
Source: PubMed Central journal article supplement (PMC5110240)
Supplement: i1552-5783-56-13-8179-s01.pdf [file i1552-5783-56-13-8179-s01.pdf]

# **Monoallelic ABCA4 Mutations Appear Insufficient to Cause Retinopathy: A Quantitative Autofluorescence Study**

## **- Supplementary material -**

Philipp L. Müller<sup>1‡</sup>, Martin Gliem<sup>1‡</sup>, Elisabeth Mangold<sup>2</sup>, Hanno J. Bolz<sup>3,4</sup>,  
Robert P. Finger<sup>1,5</sup>, Myra McGuinness<sup>5</sup>, Christian Betz<sup>3</sup>, Zhichun Jiang<sup>6</sup>,  
Bernhard H.F. Weber<sup>7</sup>, Robert E. MacLaren<sup>8</sup>, Frank G. Holz<sup>1</sup>, Roxana A. Radu<sup>6</sup>,  
Peter Charbel Issa<sup>1\*</sup>

<sup>1</sup> *Department of Ophthalmology, University of Bonn, Bonn, Germany*

<sup>2</sup> *Institute of Human Genetics, University of Bonn, Bonn, Germany*

<sup>3</sup> *Bioscientia Center for Human Genetics, Ingelheim, Germany*

<sup>4</sup> *Institute of Human Genetics, University Hospital of Cologne, Cologne, Germany*

<sup>5</sup> *Centre for Eye Research Australia, University of Melbourne, Royal Victorian Eye and Ear*

*Hospital, Melbourne, Australia*

<sup>6</sup> *Stein Eye Institute, Department of Ophthalmology, University of California at Los Angeles School of Medicine, Los Angeles, California, U.S.A.*

<sup>7</sup> *Institute of Human Genetics, University of Regensburg, Regensburg, Germany*

<sup>8</sup> *The Nuffield Laboratory of Ophthalmology & Oxford Biomedical Research Centre, University of Oxford, Oxford, UK*

*‡ Both authors contributed equally to this work*

**Supplementary Figure 1: Emission spectrum of the fluorescence reference material at 488 nm excitation.**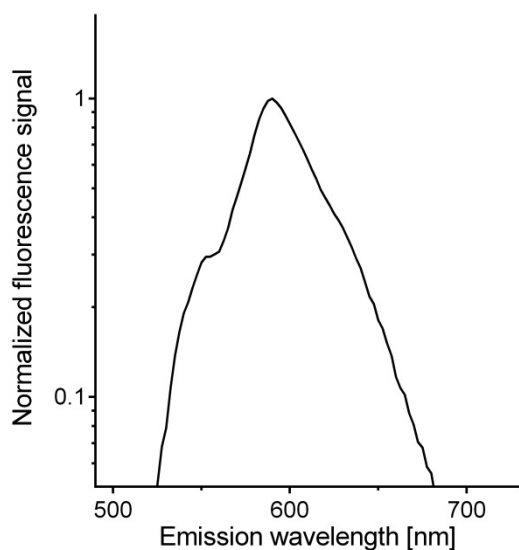

The normalized emission spectrum of the internal fluorescence reference material is shown (data kindly provided by Heidelberg Engineering). A laser beam at 488 nm was focused onto the internal reference and the emitted fluorescence light was separated by a special beam splitter from the exciting beam (constant reflectivity of about 85% for the spectral range 480 nm – 720 nm). A barrier filter with high transmission between 500 nm and 720 nm was used to remove the reflected 488 nm light. The fluorescence light was coupled into a 400  $\mu\text{m}$  core diameter multimode fiber (constant transmission between 500 and 720 nm) and coupled into a spectrometer (USB4000-VIS-NIR, OceanOptics, Dunedin, USA). The background of the raw data was subtracted and the data was normalized to the peak emission at about 590 nm. The emission spectra of the internal references used in this study and by Delori et al. are comparable,<sup>1</sup> but narrower than the emission spectrum of lipofuscin.<sup>1,2</sup>

**Supplementary Figure 2: Comparison of controls with published data.**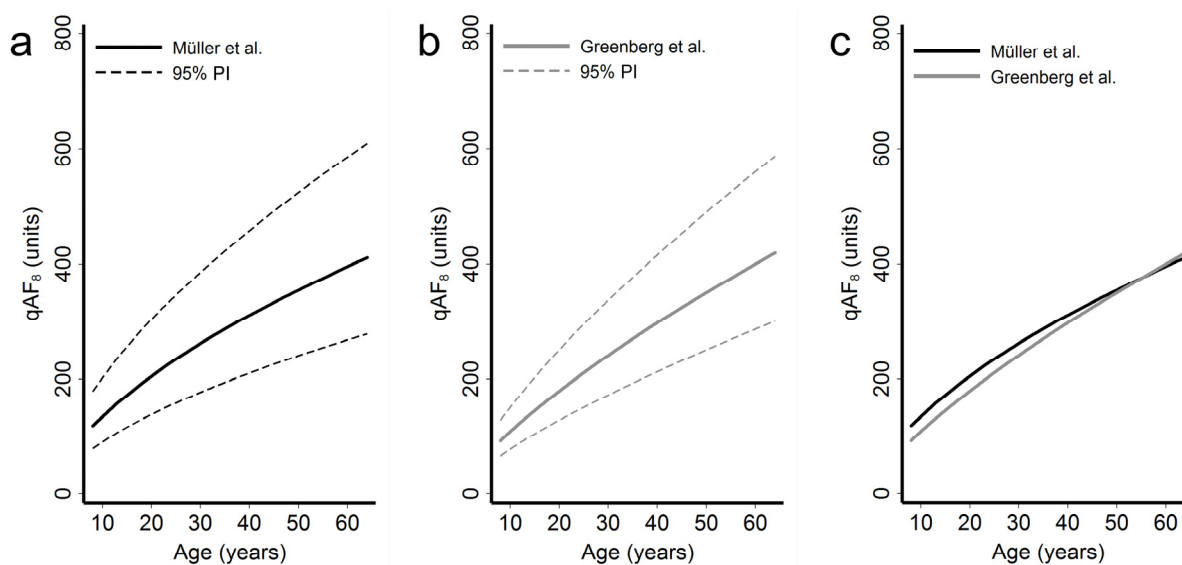

The graphs show the non-linear regression curve and the 95% prediction interval of the age-dependent qAF<sub>8</sub> values (dashed lines). To compare our data with published data by Greenberg et al.<sup>3</sup> the qAF<sub>8</sub> values of controls were fit using the following model:  $\ln(\text{qAF}_8) = 3.329 + 0.657 \times \ln(\text{age}) + e$ , which is equivalent to:  $\text{qAF}_8 = B \times \text{age}^{(0.657)} + e$ , where  $B = 27.921$  (95% confidence interval 19.165, 40.676641) and  $e$  is the residual error (a). For Caucasian subjects, Greenberg et al fit their control data using the following model:  $\text{qAF}_8 = B \times \text{age}^{(0.732)} + e$ , where  $B = 19.98$  (95% confidence interval 14.29, 27.95) and  $e$  is the residual error (b). In (c) the non-linear regression lines of (a) and (b) are overlaid. Using a Wald test of the linear hypothesis that the coefficients of our study were equal to those from Greenberg et al., there was a statistical evidence for a difference in the age coefficient ( $F(1,108) = 8.69$ ,  $P = 0.004$ ) and in the intercept coefficient ( $\chi^2(1) = 10.68$ ,  $P = 0.001$ ). However, visual comparison suggests a comparable distribution of controls.

### Supplementary Figure 3: Conventional and quantitative fundus autofluorescence of each included family.

Family 1

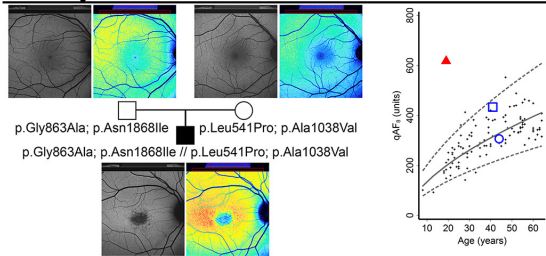

Family 2

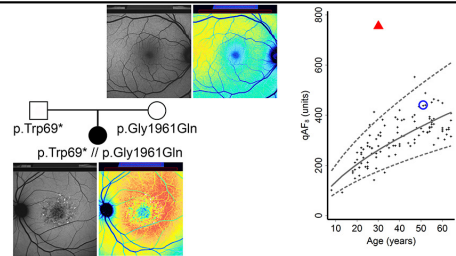

Family 3

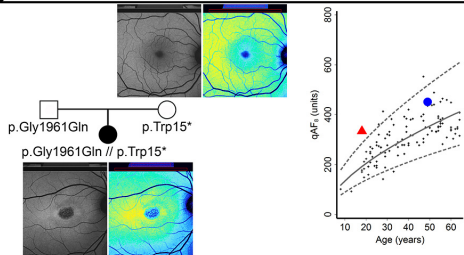

Family 4

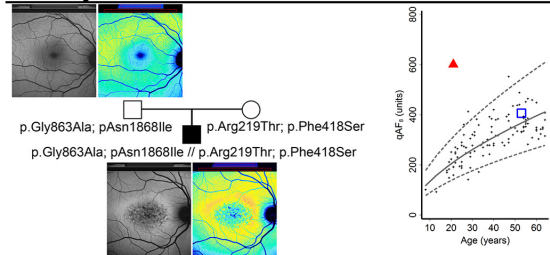

Family 5

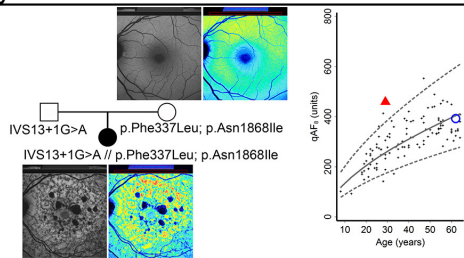

Family 6

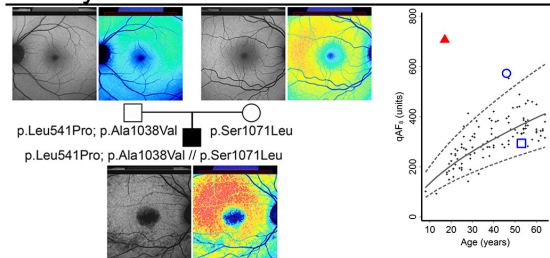

Family 7

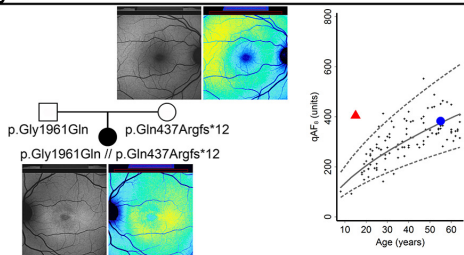

Family 8

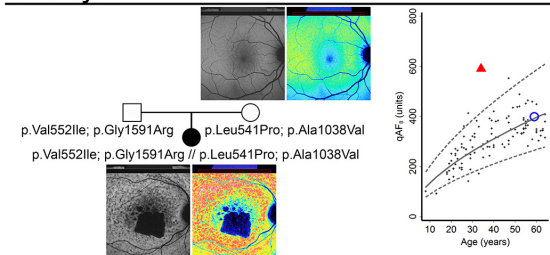

Family 9

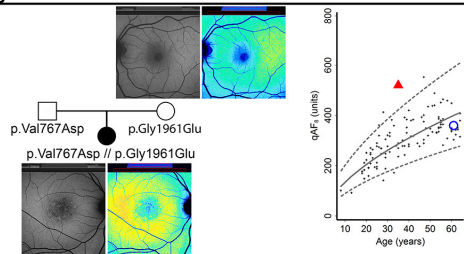

Family 10

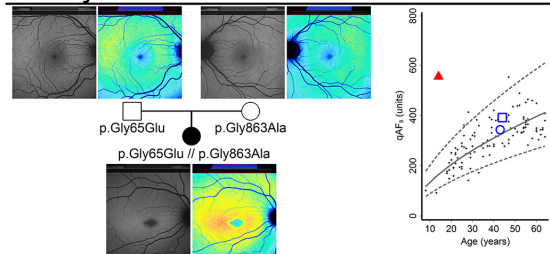

## Supplementary Figure 3 (continued)

## Family 11

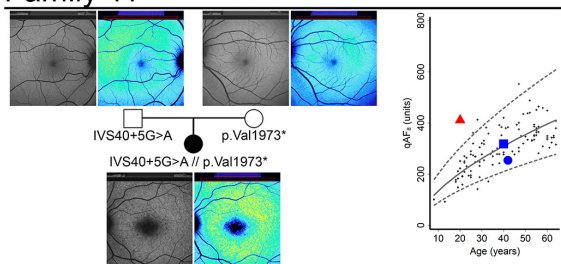

## Family 12

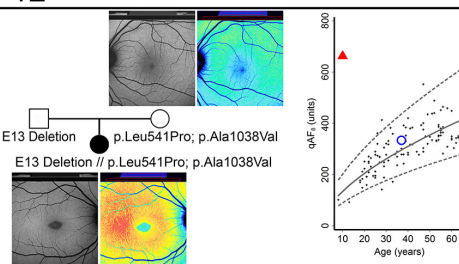

## Family 13

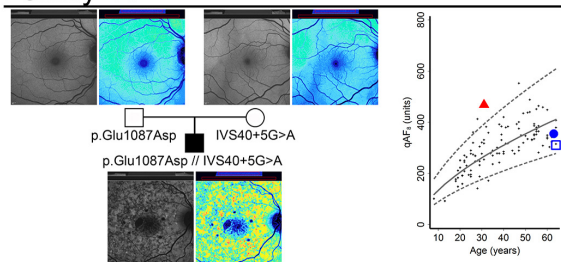

## Family 14

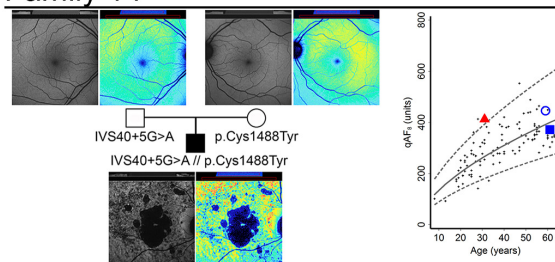

## Family 15

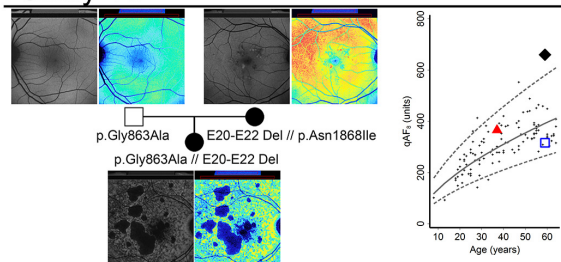

## Family 16

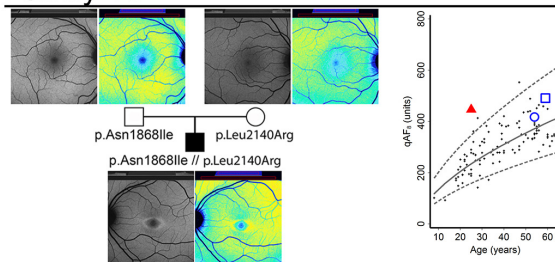

## Family 17

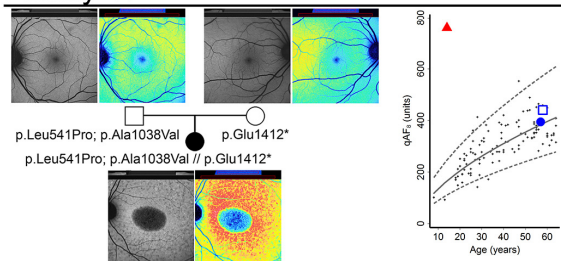

- + Control
- ▲ Index
- Father (missense mutation)
- Mother (missense mutation)
- Father (truncating mutation)
- Mother (truncating mutation)
- ◆ Mother (biallelic mutation)

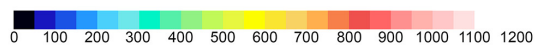

Fundus AF images (left) and corresponding color-coded quantitative AF (qAF) images (right) of all included index patients (bottom) and their parents (top). The graph to the right in each panel illustrates the qAF<sub>8</sub> of the index patients (red triangles) and their parents (blue squares and dots) with monoallelic *ABCA4*-mutations relative to the age-dependent 95% prediction interval (dashed lines) of normal controls (black crosses). qAF<sub>8</sub> values are usually high in index patients and within the normal range in their parents, who carry only one disease-causing *ABCA4* mutation.

**Supplementary Figure 4: *N*-retinylidene-phosphatidylethanolamine (*N*-Ret-PE) levels in mouse eyes.**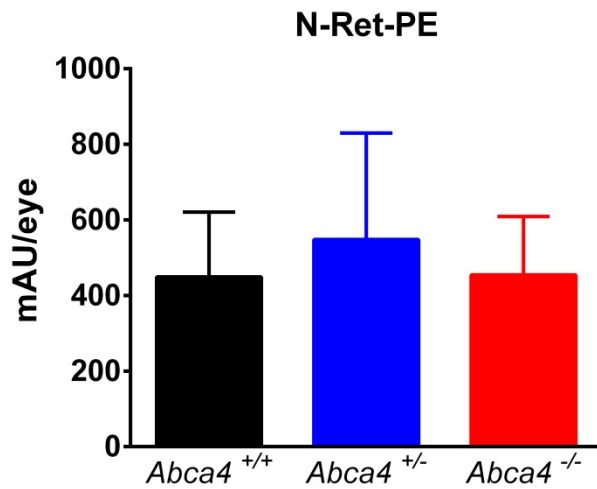

Levels of *N*-retinylidene-phosphatidylethanolamine (*N*-Ret-PE) were similar in all three groups (n=5-6). mAU/eye: milli absorbance units per eye.

Supplementary Table 1

| Exon | Coding DNA  | Protein      | Effect        | Prediction of Pathogenicity  | HGMD Class                                                      | rs Number   | Combined Allele Frequencies | dbSNP Clin. Asso. | PubMed ID |
|------|-------------|--------------|---------------|------------------------------|-----------------------------------------------------------------|-------------|-----------------------------|-------------------|-----------|
| 1    | c.45G>A     | p.Trp15*     | stopgain      | $P(6/8) = F(2/4) + C(4/4)$   | Disease-causing mutation                                        | rs62645957  | 0.00%                       | Yes               | 10090887  |
| 3    | c.194G>C    | p.Gly65Ala   | missense      | $P(14/14) = F(8/8) + C(6/6)$ | Disease-causing mutation                                        | NA          | 0.00%                       | NA                | 10206579  |
| 3    | c.206G>A    | p.Trp69*     | stopgain      | $P(7/8) = F(3/4) + C(4/4)$   | NA                                                              | NA          | 0.00%                       | NA                | NA        |
| 6    | c.656G>C    | p.Arg219Thr  | missense      | $P(7/14) = F(3/8) + C(4/6)$  | Disease-causing mutation                                        | rs61748537  | 0.00%                       | Yes               | 14517951  |
| 8    | c.1009T>C   | p.Phe337Leu  | missense      | $P(8/14) = F(3/8) + C(5/6)$  | NA                                                              | NA          | 0.00%                       | NA                | NA        |
| 10   | c.1253T>C   | p.Phe418Ser  | missense      | $P(14/14) = F(8/8) + C(6/6)$ | Disease-causing mutation                                        | NA          | 0.00%                       | NA                | 21911583  |
| 12   | c.1622T>C   | p.Leu541Pro  | missense      | $P(14/14) = F(8/8) + C(6/6)$ | Disease-causing mutation                                        | rs61751392  | 0.00% - 0.05%               | Yes               | 9781034   |
| 12   | c.1654G>A   | p.Val552Ile  | missense      | $P(7/14) = F(3/8) + C(4/6)$  | Disease-causing mutation                                        | rs145525174 | 0.00% - 0.60%               | NA                | 18024811  |
| 15   | c.2300T>A   | p.Val767Asp  | missense      | $P(13/14) = F(7/8) + C(6/6)$ | Disease-causing mutation                                        | rs61751395  | 0.00%                       | Yes               | 10711710  |
| 17   | c.2588G>C   | p.Gly863Ala  | missense (SS) | $P(11/14) = F(5/8) + C(6/6)$ | Disease-causing mutation                                        | rs76157638  | 0.00% - 1.60%               | Yes               | 9054934   |
| 21   | c.3113C>T   | p.Ala1038Val | missense      | $P(9/14) = F(3/8) + C(6/6)$  | Disease-causing mutation                                        | rs61751374  | 0.00% - 0.20%               | Yes               | 9054934   |
| 22   | c.3212C>T   | p.Ser1071Leu | missense      | $P(13/14) = F(7/8) + C(6/6)$ | Disease-causing mutation                                        | rs61750065  | 0.00% - 0.02%               | Yes               | 9973280   |
| 33   | c.4771G>A   | p.Gly1591Arg | missense (SS) | $P(7/14) = F(2/8) + C(5/6)$  | Likely disease-causing mutation                                 | rs113106943 | 0.00% - 0.82%               | NA                | 24265693  |
| 40   | c.5603A>T   | p.Asn1868Ile | missense      | $P(9/14) = F(4/8) + C(5/6)$  | Disease-associated polymorphism, supporting functional evidence | rs1801466   | 2.08% - 7.10%               | Yes               | 11328725  |
| 41   | c.5714+5G>A | NA           | splice donor  | $P(0/0) = F(0/0) + C(0/0)$   | Disease-causing mutation                                        | rs61751407  | 0.00% - 0.10%               | Yes               | 9466990   |
| 42   | c.5882G>A   | p.Gly1961Glu | missense      | $P(12/14) = F(7/8) + C(5/6)$ | Disease-causing mutation                                        | rs1800553   | 0.00% - 2.50%               | Yes               | 9295268   |

*ABCA4* mutations and prediction of pathogenicity. Resulting total prediction **P** as sum of combined functional predictions **F** (by bioinformatic tools SIFT, PolyPhen-2, MutationTaster, MutationAssessor, fathmm, LRT, VEST, CADD) and combined conservation prediction **C** (by bioinformatic tools PhyloP, GERP++, phastCons, SiPhy). Combined allele frequencies were derived from databases dbSNP, 1000 Genomes Project (TGP), Exome Sequencing Project (ESP), Complete Genomics (CG69), National Cancer Institute (NCI-60), Genome of the Netherlands (GoNL), Exome Aggregation Consortium (ExAC). NA: not applicable; SS: potentially affecting splicing.

**Supplementary Table 2**

| This Study                                                                           |                    | Previous Studies                               |                        |           |
|--------------------------------------------------------------------------------------|--------------------|------------------------------------------------|------------------------|-----------|
| Variant (Amino Acid Change)                                                          | Age at examination | Variant (Amino Acid Change)                    | Age of Onset           | Phenotype |
| <b>Truncating mutations (stop, frame shift, deletions, or splice site mutations)</b> |                    |                                                |                        |           |
| c.5714+5G>A (splice)                                                                 | 63, 40             | c.768G>T (splice)                              | 45, 49, 56, 61, 65, 72 | A         |
| c.1309delC (p.Gln437Argfs*12)                                                        | 55                 | c.4859_4864delATAACAinsTCCT (p.Asn1620fs)      | 50                     | B         |
| c.5917delG (p.Val1973*)                                                              | 42                 | c.4234C>T (p.Q1412*)                           | 50                     | B         |
| c.45G>A (p.Trp15*)                                                                   | 49                 | c.3874C>T (Gln1292*)                           | 45                     | A         |
| c.4234C>T (p.Glu1412*)                                                               | 57                 | c.C450T (p.Arg152*)                            | 70                     | E         |
| E 20-22 deletion                                                                     | 59                 | 5196+1G>T (splice)                             | 83                     | A         |
|                                                                                      |                    | c.5461-10T>C (splice)                          | 77                     | B         |
|                                                                                      |                    | c.4773+3A>G (splice)                           | 84                     | B         |
| <b>Identical missense mutations</b>                                                  |                    |                                                |                        |           |
| c.5882G>A (p.Gly1961Glu)                                                             | 51, 61             | c.5882G>A (p.Gly1961Glu)                       | 59, 52, 43, 57         | B, C, D   |
| c.1622T>C c.3113C>T (p.Leu541Pro p.Ala1038Val)                                       | 37, 44, 53, 59     | c.1622T>C c.3113C>T (p.Leu541Pro p.Ala1038Val) | 54, 56, 60, 65, 81     | B         |
| c.2588G>C (p.Gly863Ala)                                                              | 44,59              | c.2588G>C (p.Gly863Ala)                        | 39                     | C         |

**Supplementary Table 1:** Summary of monoallelic severe and mild *ABCA4* mutations detected in this study and comparison with similar and equal mutations previously reported to be associated with the phenotype of late onset Stargardt disease (A)<sup>4</sup> or a subform of age-related macular degeneration (AMD) (B) with a specific pattern on fundus autofluorescence imaging (fine granular pattern with peripheral punctate spots; GPS),<sup>5</sup> and Stargardt disease with foveal sparing (C), early AMD (D),<sup>6</sup> late onset fundus flavimaculatus (E).<sup>7</sup> Studies were selected for comparison if an age of onset was specifically mentioned.



**References:**

1. Delori F, Greenberg JP, Fischer J, et al. Quantitative measurements of autofluorescence with the scanning laser ophthalmoscope. *Invest Ophthalmol Vis Sci* 2011;52:9379-9390.
2. Delori FC. Spectrophotometer for noninvasive measurements of intrinsic fluorescence and reflectance of the ocular fundus. *Applied Optics* 1994;33:7439-7452.
3. Greenberg JP, Duncker T, Woods RL, Smith RT, Sparrow JR, Delori FC. Quantitative fundus autofluorescence in healthy eyes. *Investigative ophthalmology & visual science* 2013;54:5684-5693.
4. Westeneng-van Haften SC, Boon CJ, Cremers FP, Hoefsloot LH, den Hollander AI, Hoyng CB. Clinical and genetic characteristics of late-onset Stargardt's disease. *Ophthalmology* 2012;119:1199-1210.
5. Fritsche LG, Fleckenstein M, Fiebig BS, et al. A subgroup of age-related macular degeneration is associated with mono-allelic sequence variants in the *ABCA4* gene. *Investigative ophthalmology & visual science* 2012;53:2112-2118.
6. Simonelli F, Testa F, de Crecchio G, et al. New ABCR mutations and clinical phenotype in Italian patients with Stargardt disease. *Investigative ophthalmology & visual science* 2000;41:892-897.
7. Souied EH, Ducroq D, Rozet JM, et al. A novel ABCR nonsense mutation responsible for late-onset fundus flavimaculatus. *Investigative ophthalmology & visual science* 1999;40:2740-2744.
